# Supplementary material
Source: publisher figshare collection journal article supplement (https://acs.figshare.com/ndownloader/files/28211277)
Supplement: Supplementary file 1 [file 28211277]

## Supporting Information

# Highly efficient sky-blue perovskite light-emitting diode via suppressing non-radiative energy loss

*Zhaohua Zhu<sup>1,2</sup>, Yan Wu<sup>1,2</sup>, Yang Shen<sup>4</sup>, Jihua Tan<sup>1,2</sup>, Dong Shen<sup>1,2</sup>, Ming-Fai Lo<sup>3</sup>, Menglin Li<sup>2,3</sup>, Yi Yuan<sup>3</sup>, Jian-Xin Tang<sup>4</sup>, Wenjun Zhang<sup>2,3</sup>, Sai-Wing Tsang<sup>2,3</sup>, Zhiqiang Guan<sup>1,2,3\*</sup>, Chun-Sing Lee<sup>1,2\*</sup>*

<sup>1</sup>Department of Chemistry, City University of Hong Kong, Kowloon 999077, Hong Kong SAR, P. R. China

<sup>2</sup>Center of Super-Diamond and Advanced Films (COSDAF), City University of Hong Kong, Kowloon, Hong Kong SAR 999077, P. R. China

<sup>3</sup>Department of Material Science and Engineering, City University of Hong Kong, Kowloon 999077, Hong Kong SAR, P. R. China

<sup>4</sup>Institute of Functional Nano and Soft Materials (FUNSOM), Jiangsu Key Laboratory for Carbon-Based Functional Materials and Devices, Soochow University, Suzhou 215123, Jiangsu, China

\*Corresponding author

**Email:** zqguan2@cityu.edu.hk; apcslee@cityu.edu.hk

## Supplementary Note

### 1. Charge-modulated electroabsorption spectroscopy (CMEAS)

CMEAS is a technique that can record charge-transfer process<sup>[1]</sup>. When a charge-transfer process occurs (for example, an electron transfers from inorganic cluster to organic ligand), a hole will leave in the inorganic cluster. Under a modulated electric field, the separated charges (electron or hole) experience a trapping/de-trapping process, which slows down the response to the modulated field. This is different from the situation of excitonic transition states, who can response extremely fast to the modulated field and thus generate a strong in-phase signal. The charge-transfer process, on the contrary, leads to obvious quadrature signals.

Another evidence for the occurrence of triplet-triplet energy transfer is the different response to the varied DC biases between excitonic state and charge-transfer state. The EA signal of excitonic state can be expressed as Stark effect, where EA

signal is proportional to the build-in potential<sup>[2]</sup>. On the other hand, charge-transfer states show a DC voltage independent feature, which does not follow Stark effect<sup>[1]</sup>. The CMEAS signal of DC voltage dependence is shown in **Figure S15** (Supporting Information). For the signals of PEACl-based perovskite excited at 3.2 eV, a DC voltage independent feature can be found, proving that the triplet-triplet Dexter electron-transfer occurs at this energy level. Whereas for the signals of 3.6 eV, a high energy vibrational excitonic state, a slowly decrease with increasing DC voltage can be observed, accompanied with a sudden rise appeared at 2.5 V. The inflection represents the directional change of build-in potential. The DC voltage dependent experiments were also carried out for EDBECl<sub>2</sub>-based perovskite aiming to provide more evidence. Signals excited at 2.5 eV and 3.54 eV are exhibited. Both of them show the feature of excitonic states, demonstrating that no triplet-triplet electron-transfer happens.

## **2. Calculation on density of trap states for holes and electrons**

Single carrier devices are used for calculating the density of trap states. The structure of hole-only device (HOD) is ITO/PEDOT:PSS/PVK/PFI/perovskite/TFB (30

nm)/MoO<sub>3</sub> (10 nm)/Ag (100 nm), where TFB is poly [(9,9-dioctylfluorenyl-2,7-diyl)-co-(4,40-(N-(p-butylphenyl))- diphenylamine)]. The structure of electron-only device (EOD) is ITO/ZnO (40 nm)/perovskite/TPBi/LiF/Al. The J-V curve of single carrier devices can be divided into three regions in log-log graph, i.e. the Ohmic region at low voltage (n=1, where n is the slope), the trap-filled limit region (n>3) and space-charge-limited current regime (n=2). A trap-filled limit voltage (V<sub>TFL</sub>) is defined as the crossover point between Ohmic and trap-filled limit regions, which means all the traps are filled with carriers<sup>[3]</sup>.

The densities of hole and electron traps can be calculated via an equation of

$$n_{t(e/h)} = 2\epsilon\epsilon_0 V_{TFL(e/h)} / (ed^2) \quad (1)$$

where  $n_{t(e/h)}$  is trap density for electron ( $n_{t(e)}$ ) and hole ( $n_{t(h)}$ ), respectively;  $\epsilon=4.8$  is relative permittivity<sup>[4]</sup>,  $\epsilon_0$  is vacuum permittivity,  $e$  is elementary charge and  $d$  is the thickness of perovskite layer. The measured J-V curves of hole-only- and electron-only- devices are shown in **Figure S8** and **S9**, respectively. Resultant values are listed in **Table S4**.



## Supplementary Figure

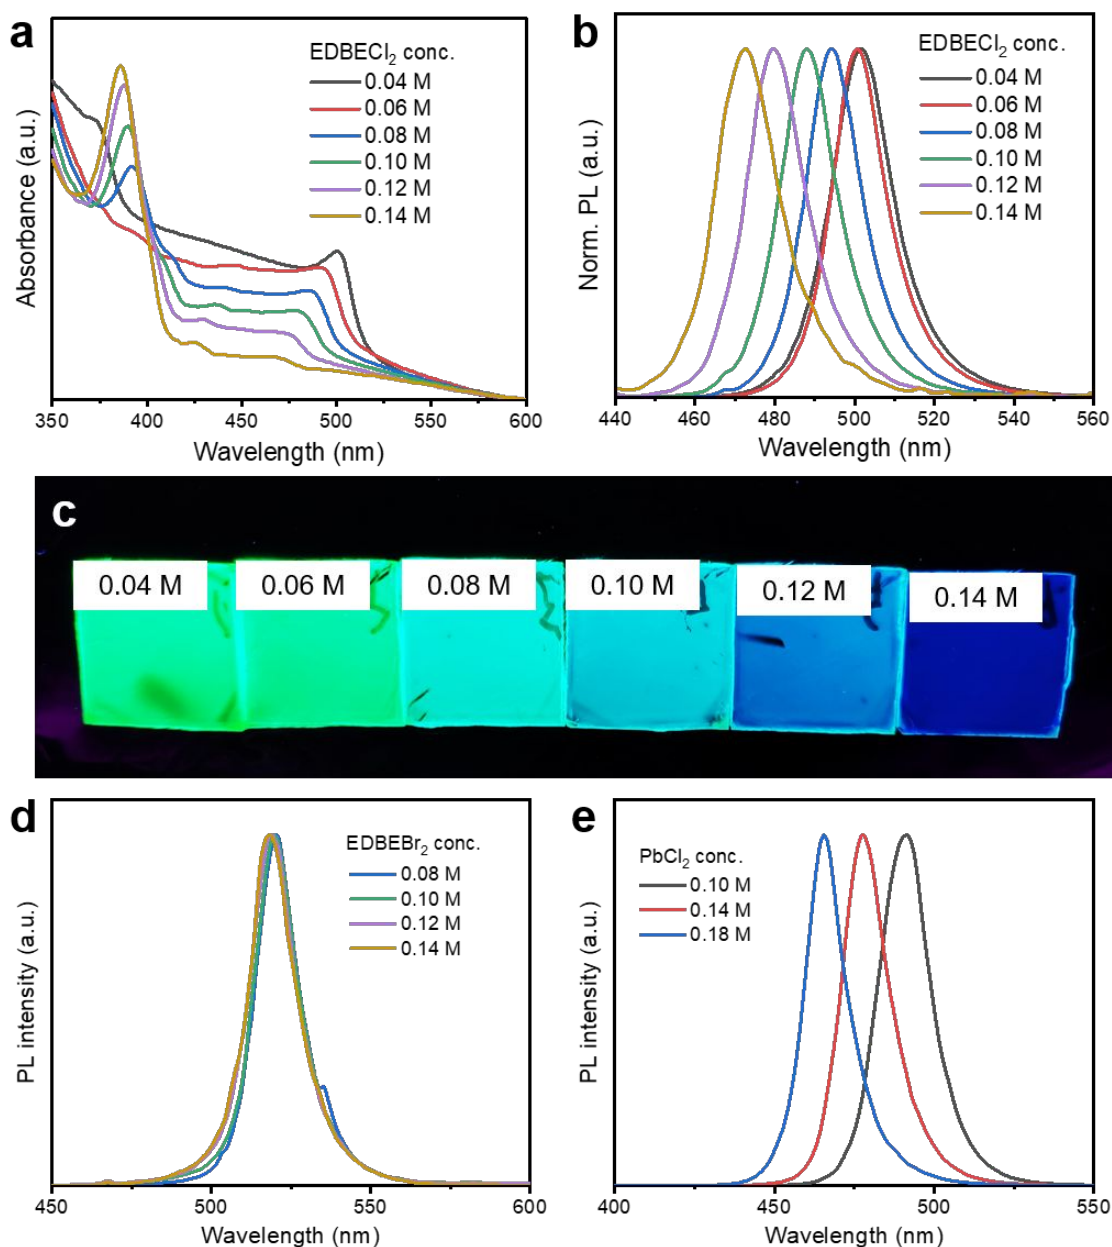

**Figure S1. Spectra and photographs of perovskite films.** (a) Absorption spectra of perovskite films. The 3D peak blue-shift from 501 to 467 nm and excitonic peak of  $n=2$  phase blue-shift from 391 to 386 nm. (b) PL spectra of perovskite films. PL peaks blue-shift from 502 to 473 nm. (c) Photographs of perovskite films excited with UV light at 375 nm. Emissive colors change from green to blue with increasing the EDBECl<sub>2</sub>

concentration. (d) PL spectra of perovskite films with different EDBEBr<sub>2</sub> concentration.  
(e) PL spectra of perovskite films with different PbCl<sub>2</sub> concentration.

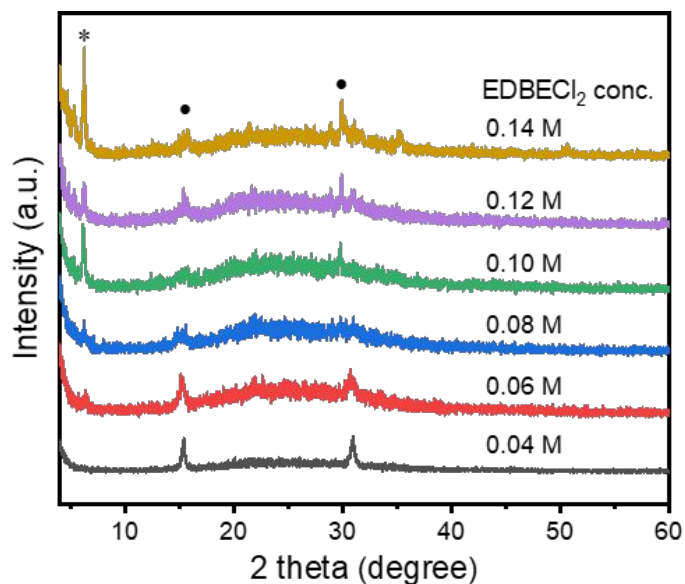

**Figure S2.** XRD patterns of perovskite films with different EDBECl<sub>2</sub> concentration. Peaks with asterisk (\*) belong to (020) plane of quasi-2D perovskite and peaks with circle mark (•) are from (101) and (202) planes of 3D perovskite. With increase of EDBECl<sub>2</sub> concentration, intensity of (020) peak becomes higher while (101) and (202) peaks become lower, indicating a change from 3D to 2D structure.





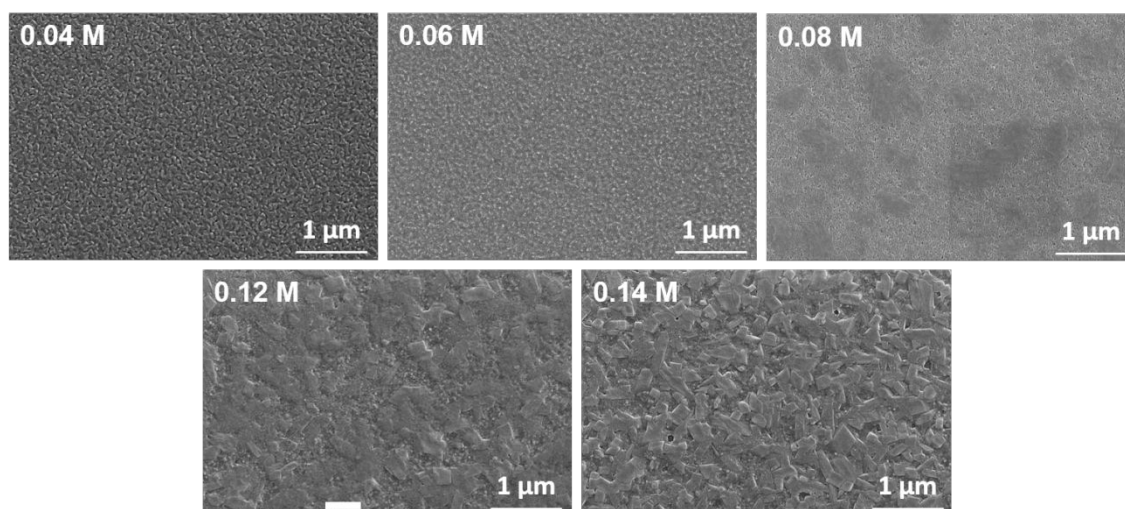

**Figure S3. SEM images of the perovskite films with different EDBECl<sub>2</sub> concentration.** Introducing EDBECl<sub>2</sub> can reduce perovskite crystallite size, which is a typical process in quasi-2D system. Nevertheless, too much EDBECl<sub>2</sub> leads to rough morphologies with large plate-shape 2D perovskite covering on the surface.

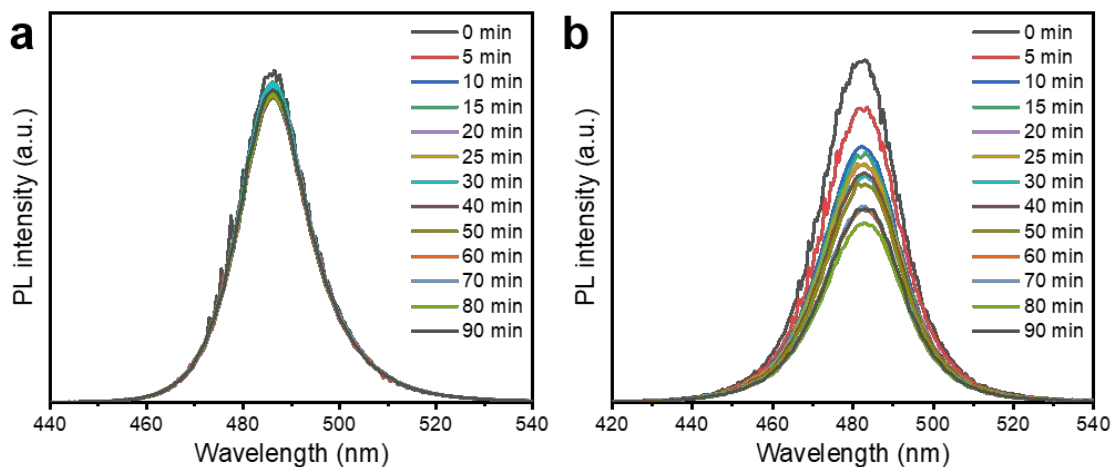

**Figure S4. PL evolution of two kinds of quasi-2D perovskites with EDBECl<sub>2</sub> and PEACl through heat treatment of 60 °C. (a) PL spectra of EDBECl<sub>2</sub> perovskite. The intensity drops for only 6% after 90 min without any peak shift. (b) PL spectra of PEACl perovskite. Intensity drops for more than 50% and the red-shift of 3 nm happens after 90 min heat treatment.**

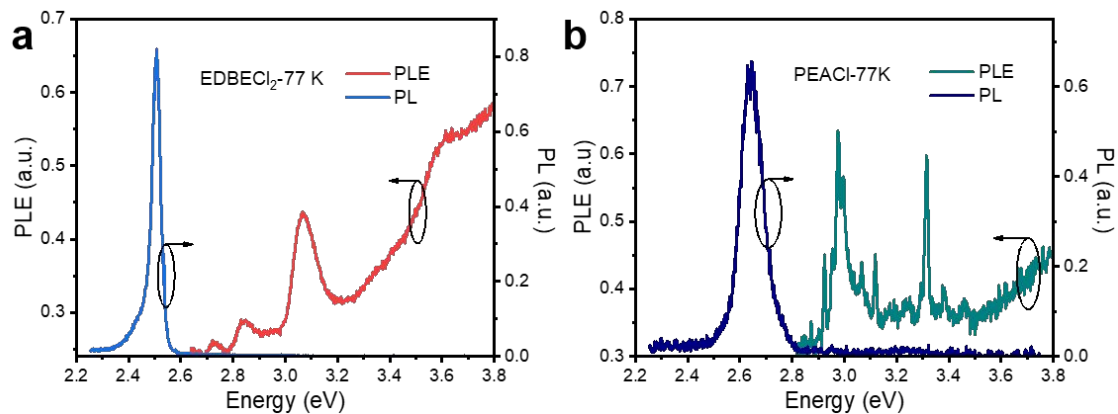

**Figure S5. PLE and PL spectra measured at 77 K.** (a) PLE and PL spectra of EDBECI<sub>2</sub>-based perovskite. PLE spectra show the highest excitonic peak at 3.07 eV ( $n=2$ ) together with a continuum band from 3.2 eV. (b) PLE and PL spectra of PEACI-based perovskite. The highest excitonic peak of  $n=1$  is at 3.32 eV and the continuum band starts from 3.5 eV.

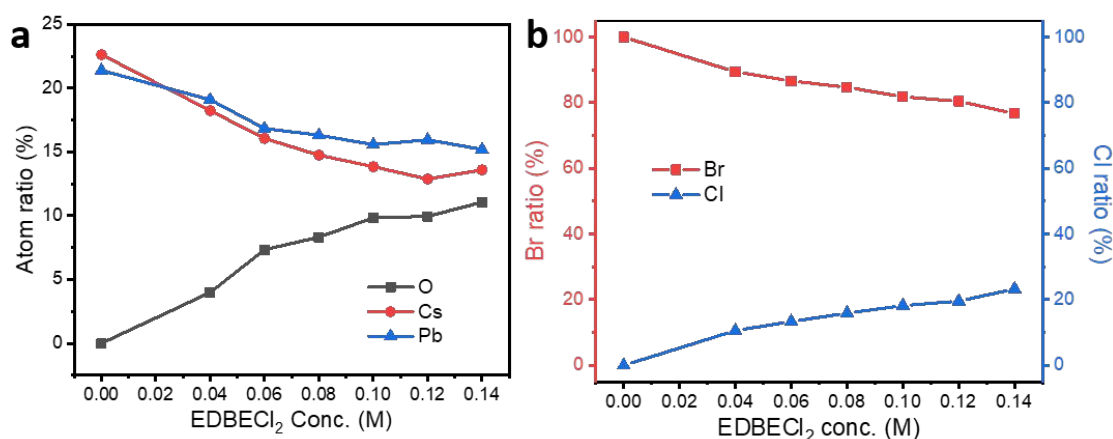

**Figure S6. Statistics of atom ratio in perovskite with different EDBECl<sub>2</sub> concentrations.**

(a) Statistics of atom ratio of O, Cs and Pb in all elements. With increase of EDBECl<sub>2</sub> concentration, O ratio keeps rising. For the concentration of 0.1 M, a rough ratio of ligand: inorganic cluster is about 1: 3. Considering there should be an amount of  $n=\infty$  phase, excess EDBECl<sub>2</sub> molecules exist outside the perovskite crystal lattice, serving as Lewis base PAs. (b) Relative statistics of atom ratio between Br and Cl. With increase of EDBECl<sub>2</sub> concentration, Cl ratio increases and Br decrease. The ratio of Cl: Br is close to 1:4 for 0.1 M EDBECl<sub>2</sub>.

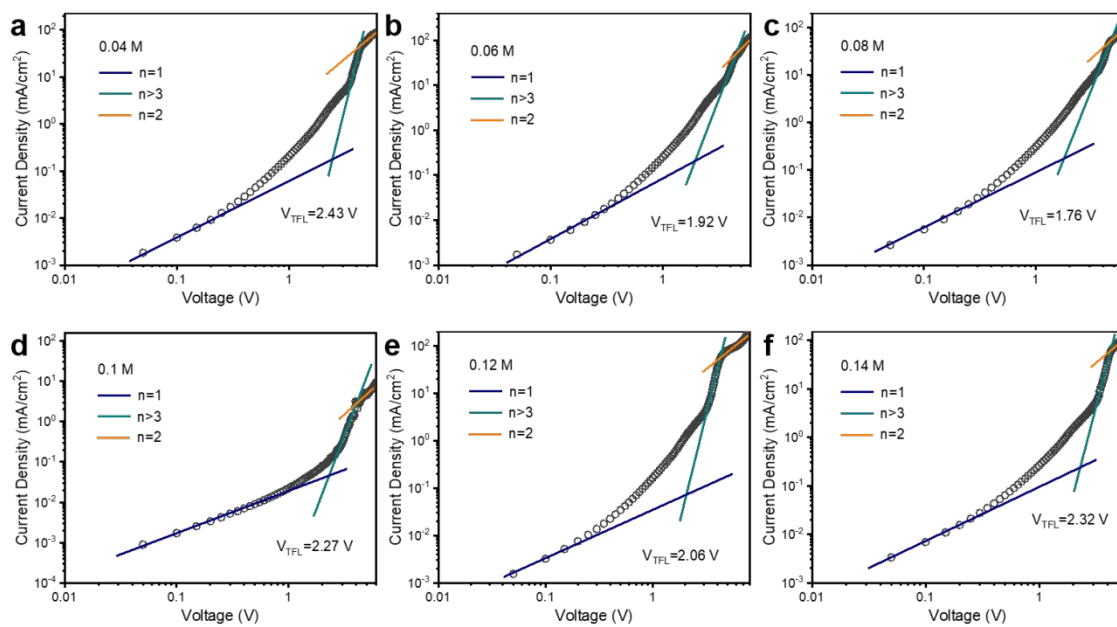

**Figure S7.** Current density-voltage (J-V) curves of hole-only devices with different EDBECI<sub>2</sub> concentrations.



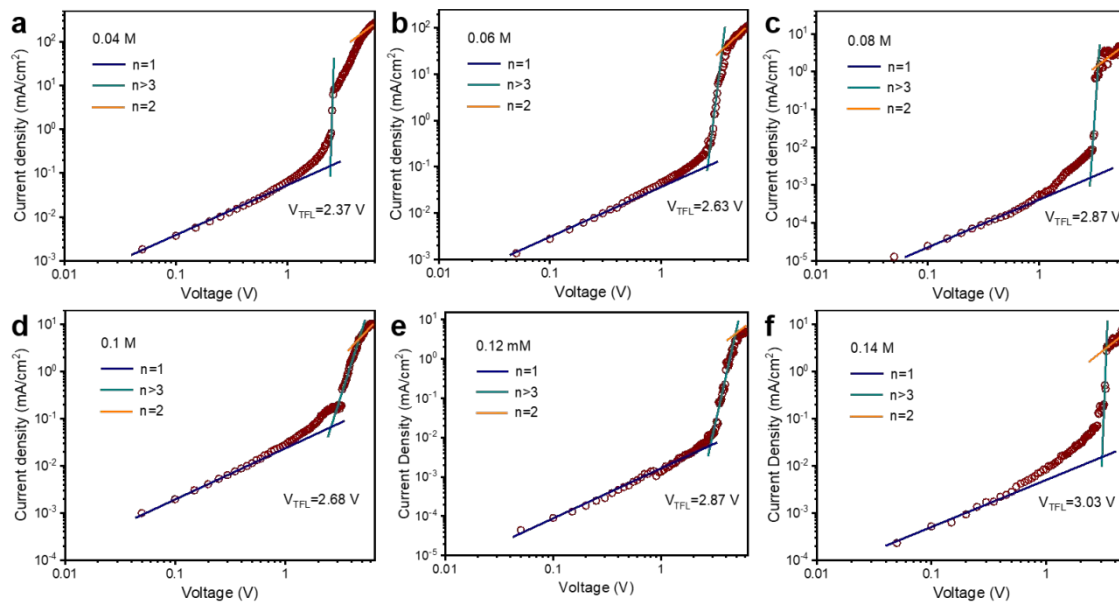

**Figure S8.** J-V curves of electron-only devices with different EDBECl<sub>2</sub> concentrations.



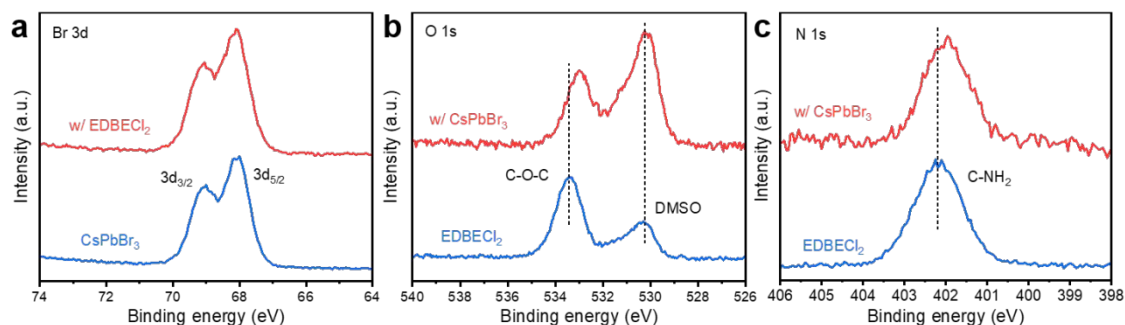

**Figure S9. High resolution XPS core level spectra of perovskites with and without EDBECI<sub>2</sub>.** (a) Br 3d, (b) O 1s and (c) N 1s. For Br 3d peaks, EDBECI<sub>2</sub> does not change the profile of XPS spectra. However, adding ligand shifts the peaks of O 1s and N 1s to lower energy, which is opposite to the Cs 3d and Pb 4f, suggesting interactions between Cs<sup>+</sup>/Pb<sup>2+</sup> ions in inorganic layers and C-O-C/-NH<sub>2</sub> groups in EDBECI<sub>2</sub>.

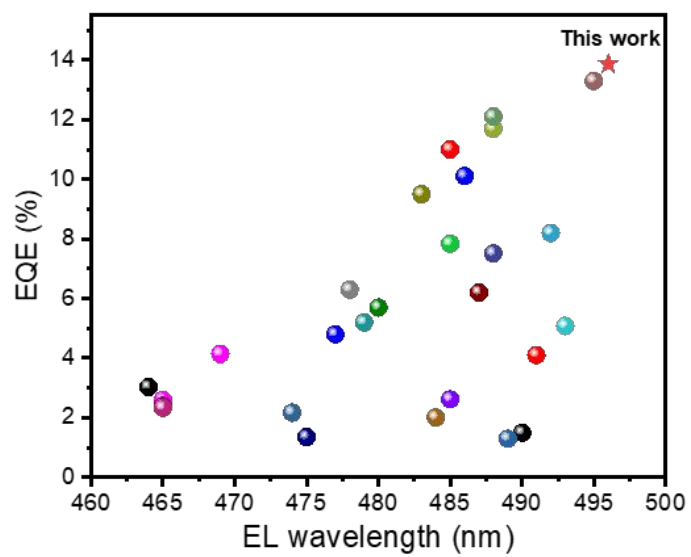

**Figure S10.** Summary of the EQE of PeLEDs at different emitting wavelength.

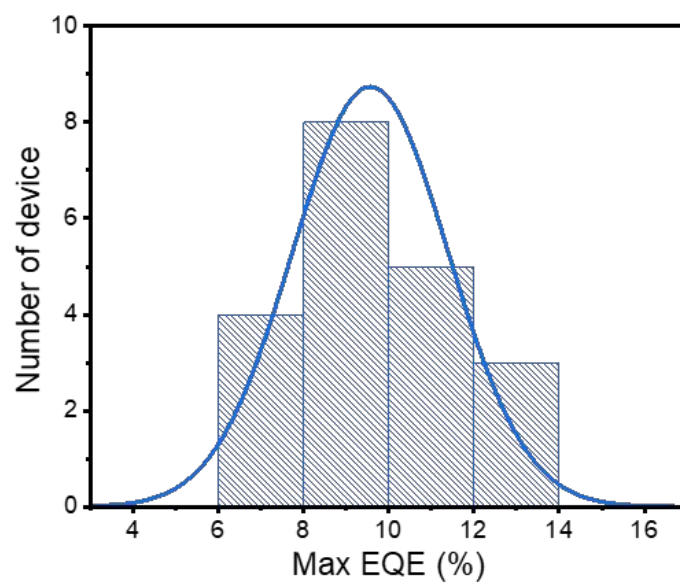

**Figure S11.** The histogram of EQEs from 20 devices.



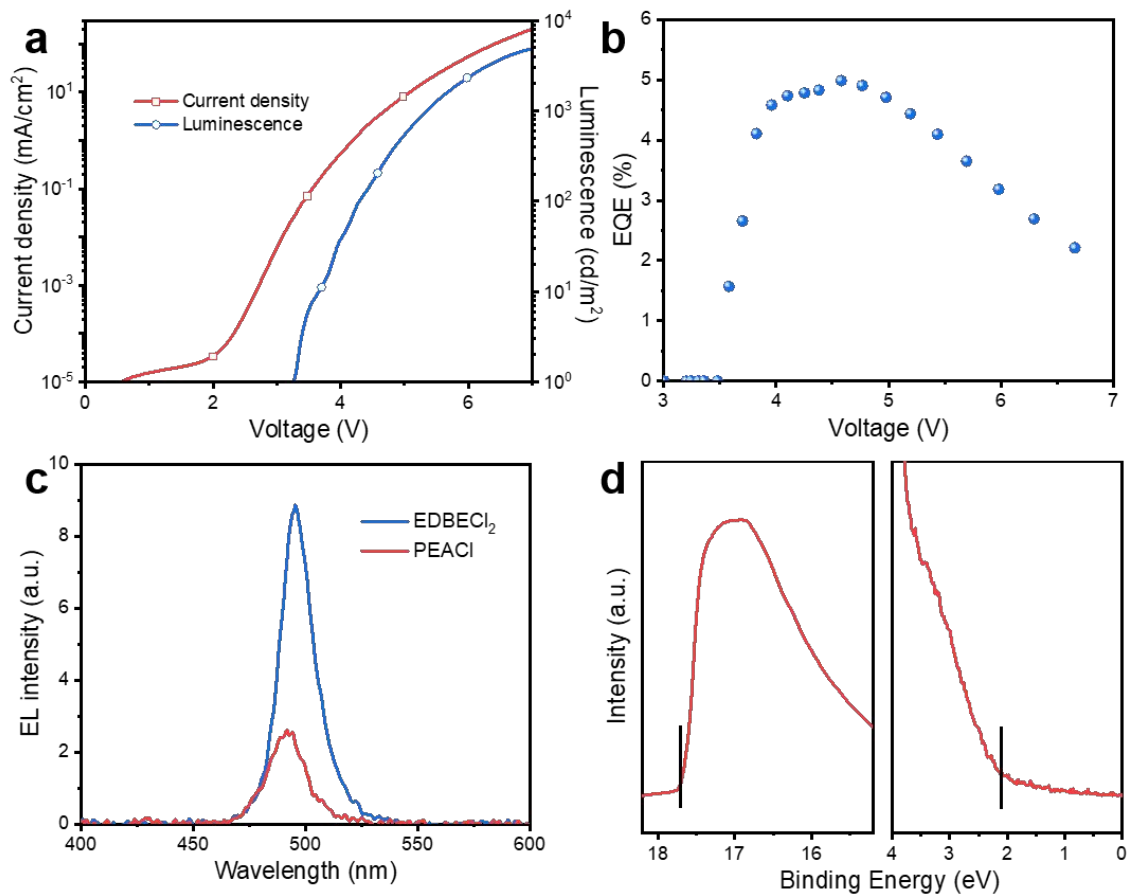

**Figure S12. Characterization of PeLED based on PEACl.** (a) J-V-L curves. (b) EQE results. (c) Comparison in EL spectra between EDBECI<sub>2</sub><sup>-</sup> and PEACl-based PeLEDs. (d) UPS spectra of PEACl-based perovskite.



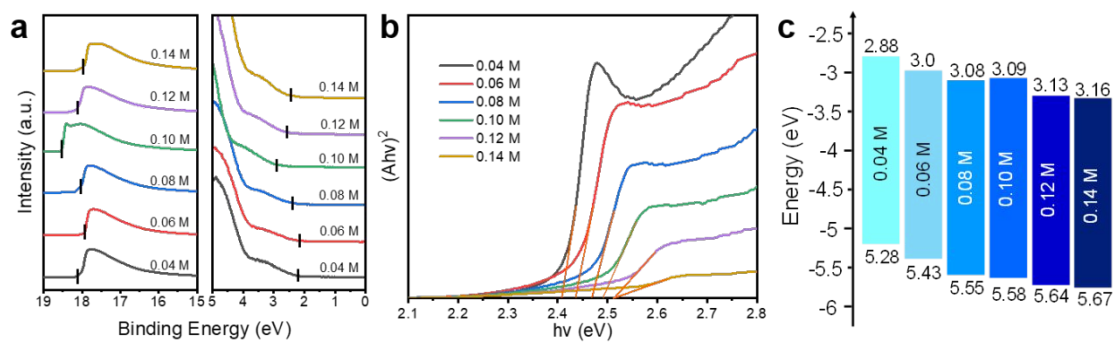

**Figure S13. Energy band diagram of perovskites with different EDBECI<sub>2</sub> concentrations.**  
 (a) UPS spectra. (b) Tauc plots. (c) Energy diagram.





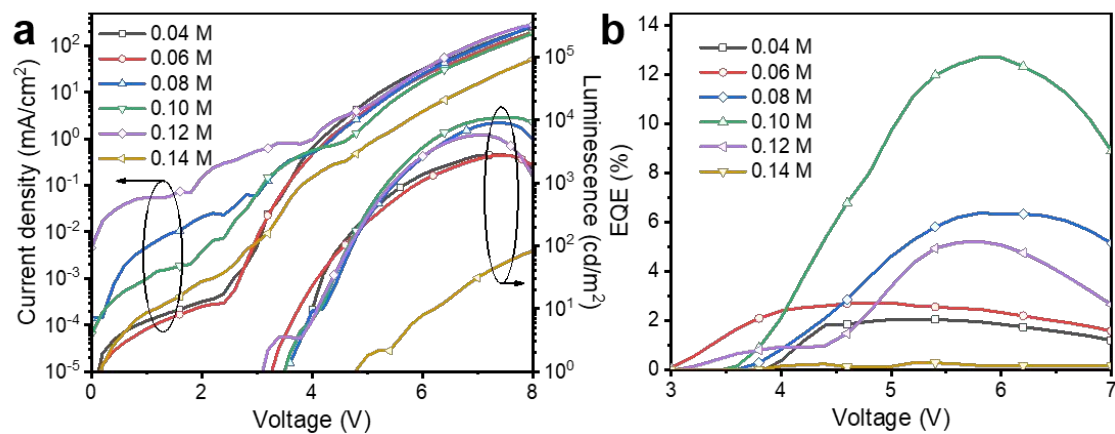

**Figure S14.** Characterization of PeLEDs with different EDBECl<sub>2</sub> concentrations. (a) J-V-L curves. (b) EQE results.

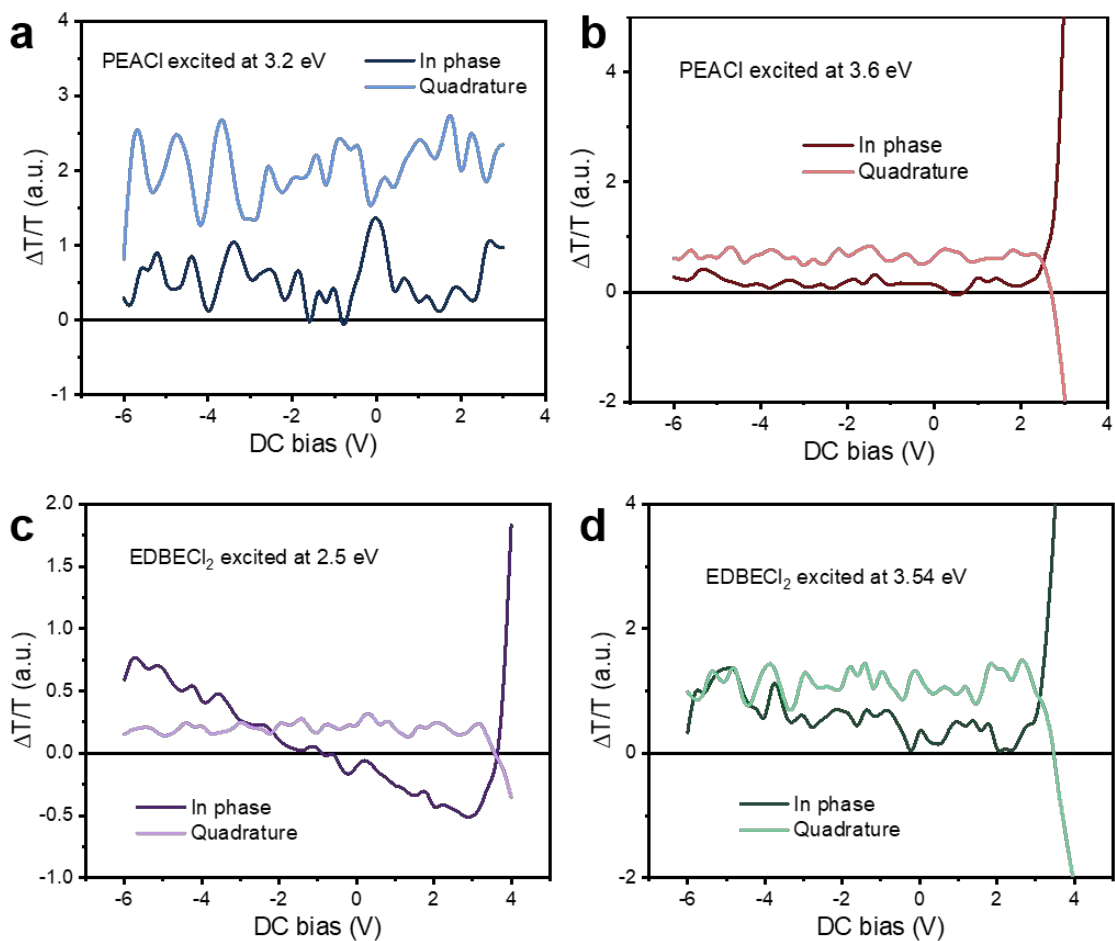

**Figure S15.** DC voltage dependent CMEAS signals of (a, b) PEACl- and (c, d) EDBECl<sub>2</sub>-based perovskite excited at different energy.



## Supplementary Table

**Table S1.** Properties of excited states of EDBECl<sub>2</sub>.

| $E_{\text{HOMO}}/\text{eV}$ | $E_{\text{LUMO}}/\text{eV}$ | $E_g/\text{eV}$ | $E_{\text{S}_1}/\text{eV}$ | $E_{\text{T}_1}/\text{eV}$ |
|-----------------------------|-----------------------------|-----------------|----------------------------|----------------------------|
| -6.76                       | -0.33                       | 6.43            | 5.4340                     | 5.2308                     |

**Table S2.** Parameters used to calculate hole and electron trap densities. EOD/HOD is short for electron/hole-only device. d is thickness of perovskite layer,  $n_t$  is trap density.

|     | EDBECl <sub>2</sub> conc. (M) | V <sub>TFL</sub> (V) | d (nm) | $n_t$ (10 <sup>17</sup> cm <sup>-3</sup> ) |
|-----|-------------------------------|----------------------|--------|--------------------------------------------|
| EOD | 0.04                          | 2.37                 | 48.3   | 5.3932                                     |
|     | 0.06                          | 2.63                 | 61.9   | 3.6439                                     |
|     | 0.08                          | 2.87                 | 69.6   | 3.1453                                     |
|     | 0.10                          | 2.58                 | 78.6   | 2.217                                      |
|     | 0.12                          | 2.87                 | 89.1   | 1.9192                                     |
|     | 0.14                          | 3.03                 | 99     | 1.6412                                     |
| HOD | 0.04                          | 2.43                 | 30     | 14.3338                                    |
|     | 0.06                          | 1.92                 | 32.8   | 9.4744                                     |
|     | 0.08                          | 1.76                 | 35     | 7.6273                                     |
|     | 0.10                          | 2.27                 | 40.1   | 7.4943                                     |
|     | 0.12                          | 2.06                 | 43.7   | 5.7267                                     |
|     | 0.14                          | 2.32                 | 47.9   | 5.368                                      |

**Table S3.** Summary on EL performance of reported blue PeLEDs.

| System                                                                                                                         | EL peak (nm) | EQE <sub>Max</sub> (%) | L <sub>Max</sub> (cd m <sup>-2</sup> ) | Half lifetime                    | Ref                                             |
|--------------------------------------------------------------------------------------------------------------------------------|--------------|------------------------|----------------------------------------|----------------------------------|-------------------------------------------------|
| IPA/PEA <sub>2</sub> MA/Cs <sub>n-1</sub> Pb <sub>n</sub> Br <sub>3n-1</sub>                                                   | 490          | 1.5                    | 2480                                   | 10 min@10 cd/m <sup>2</sup>      | Nat. Commun., <b>2018</b> , 9, 3541             |
| PEACl:CsPbBr <sub>3</sub> :YCl <sub>3</sub>                                                                                    | 485          | 11                     | 9040                                   | 120 min@3.2 V                    | Nat. Commun., <b>2019</b> , 10, 5633            |
| PEACl:CsPbBr <sub>3</sub> :YCl <sub>3</sub>                                                                                    | 477          | 4.8                    | NA                                     | NA                               | Nat. Commun., <b>2019</b> , 10, 5633            |
| P-PDA,PEACs <sub>n-1</sub> Pb <sub>n</sub> Br <sub>3n+1</sub>                                                                  | 465          | 2.6                    | 211                                    | 13.5 min@0.35 mA/cm <sup>2</sup> | Adv. Mater., <b>2019</b> , 31, 1904319          |
| CsPbCl <sub>0.9</sub> Br <sub>2.1</sub> with PEA                                                                               | 480          | 5.7                    | 3780                                   | 10 min@4.4 V                     | Nat. Commun., <b>2019</b> , 10, 1027            |
| PEA <sub>2</sub> (Rb <sub>0.6</sub> Cs <sub>0.4</sub> ) <sub>2</sub> Pb <sub>3</sub> Br <sub>10</sub>                          | 475          | 1.35                   | 100.6                                  | 14.5 min @ 4.5 V                 | Nat. Commun., <b>2019</b> , 10, 1868            |
| PEA <sub>2</sub> NPA <sub>1</sub> Cs <sub>2</sub> Pb <sub>3</sub> Br <sub>12</sub>                                             | 485          | 2.62                   | 1200                                   | 8.8 min@3.0 V                    | Adv. Funct. Mater., <b>2020</b> , 30, 1908339   |
| BA <sub>2</sub> Cs <sub>n-1</sub> Pbn(Br/Cl) <sub>3n+1</sub>                                                                   | 465          | 2.4                    | 963                                    | NA                               | Chem. Mater. <b>2019</b> , 31, 83–89            |
| BA <sub>2</sub> Cs <sub>n-1</sub> Pbn(Br/Cl) <sub>3n+1</sub>                                                                   | 487          | 6.2                    | 3339                                   | NA                               | Chem. Mater. <b>2019</b> , 31, 83–89            |
| PBABr <sub>y</sub> (Cs <sub>0.7</sub> FA <sub>0.3</sub> PbBr <sub>3</sub> )                                                    | 483          | 9.5                    | 54                                     | 4.2 min@100 cd/m <sup>2</sup>    | Nat. Photonics, <b>2019</b> , 13, 760-764       |
| DPPOCl treated PEA <sub>2</sub> Cs <sub>1.6</sub> MA <sub>0.4</sub> Pb <sub>3</sub> Br <sub>10</sub>                           | 489          | 1.3                    | 5141                                   | 51 min at 1500 cd/m <sup>2</sup> | J. Am. Chem. Soc., <b>2020</b> , 142, 5126–5134 |
| DPPOCl treated PEA <sub>2</sub> Cs <sub>1.6</sub> MA <sub>0.4</sub> Pb <sub>3</sub> Br <sub>10</sub>                           | 479          | 5.2                    | 468                                    | 90 min@100 cd/m <sup>2</sup>     | J. Am. Chem. Soc., <b>2020</b> , 142, 5126–5134 |
| (Cs/Rb/FA/PEA/K)Pb(Cl/Br) <sub>3</sub>                                                                                         | 484          | 2.01                   | 4015                                   | 300 min@80 cd/m <sup>2</sup>     | ACS Energy Lett., <b>2020</b> , 5, 1062–1069    |
| (BA <sub>x</sub> PEA <sub>1-x</sub> ) <sub>2</sub> Cs <sub>n-1</sub> Pbn(Br <sub>0.7</sub> Cl <sub>0.3</sub> ) <sub>3n+1</sub> | 485          | 7.84                   | 1130                                   | 5.2 min@100 cd/m <sup>2</sup>    | Small, <b>2020</b> , 16, 2002940                |
| (PBA/PEA) <sub>2</sub> (MA/FA/Cs) <sub>n-1</sub> PbnBr <sub>3n+1</sub>                                                         | 465          | 2.34                   | 144.9                                  | NA                               | ACS Energy Lett., <b>2020</b> , 5, 1593–1600    |
| (PBA/PEA) <sub>2</sub> (MA/FA/Cs) <sub>n-1</sub> PbnBr <sub>3n+1</sub>                                                         | 493          | 5.08                   | 1151                                   | 4.2 min@12 cd/m <sup>2</sup>     | ACS Energy Lett., <b>2020</b> , 5, 1593–1600    |
| PEA <sub>x</sub> PA <sub>2-x</sub> (CsPbBr <sub>3</sub> ) <sub>n-1</sub> PbBr <sub>4</sub>                                     | 488          | 7.51                   | 1765                                   | 3961 s@1.5 mA/cm <sup>2</sup>    | ACS Energy Lett., <b>2020</b> , 5, 2569–2579    |
| NaBr modified PEABr <sub>x</sub> (CsPb(Cl/Br) <sub>3</sub> )                                                                   | 488          | 11.7                   | 1511                                   | ~560 s@100 cd/m <sup>2</sup>     | ACS Nano <b>2020</b> , 14, 11420–11430          |
| GABA treated PEA <sub>2</sub> Cs <sub>n-1</sub> PbnBr <sub>3n+1</sub>                                                          | 478          | 6.3                    | 200                                    | 150 s@200 cd/m <sup>2</sup>      | Nat. Commun., <b>2020</b> , 11, 3674            |
| PEA <sub>2</sub> (CsPbBr <sub>3</sub> ) <sub>n-1</sub> PbBr <sub>4</sub> with EABr                                             | 495          | 13.3                   | 2790                                   | ~230 s@0.35 mA/cm <sup>2</sup>   | Nat. Commun., <b>2020</b> , 11, 4165            |
| PEA <sub>2</sub> (CsPbBr <sub>3</sub> ) <sub>n-1</sub> PbBr <sub>4</sub> with EABr                                             | 488          | 12.1                   | 2191                                   | NA                               | Nat. Commun., <b>2020</b> , 11, 4165            |
| GABr incorporated 2D/3D perovskite                                                                                             | 492          | 8.2                    | 1003                                   | 274 s@21 cd/m <sup>2</sup>       | Adv. Funct. Mater., <b>2020</b> , 30, 2001732   |

|                                                                                      |     |       |      |                                     |                                                        |
|--------------------------------------------------------------------------------------|-----|-------|------|-------------------------------------|--------------------------------------------------------|
| EDABr <sub>2</sub> substituted<br>PEA <sub>2</sub> CsPb <sub>2</sub> Br <sub>7</sub> | 474 | 2.17  | 290  | NA                                  | ACS Appl. Mater. Interfaces <b>2020</b> ,<br>12, 45056 |
| DPPACl passivated<br>perovskite                                                      | 464 | 3.03  | 69.4 | 7 min @5 V                          | Adv. Funct. Mater., <b>2020</b> , 2005553              |
| Sr-substituted perovskite                                                            | 491 | 4.1   | 968  | 60 min@10 cd/m <sup>2</sup>         | Adv. Optical Mater., <b>2020</b> , 2001073             |
| ABA incorporated quai-2D<br>perovskite                                               | 486 | 10.11 | 513  | 81.3 min@ 0.3<br>mA/cm <sup>2</sup> | Adv. Mater., <b>2020</b> , 2005570                     |
| K modified interface between<br>HTL and perovskite                                   | 469 | 4.14  | 451  | 14.0 min@ 1.0<br>mA/cm <sup>2</sup> | Adv. Funct. Mater., <b>2020</b> , 2006736              |
| EDBECl <sub>2</sub> treat CsPbBr <sub>3</sub>                                        | 496 | 13.87 | 2825 | 26 min@100 cd/m <sup>2</sup>        | This work                                              |

## Reference

- (1) Tsang, S. W.; Chen, S.; So, F., Energy level alignment and sub-bandgap charge generation in polymer:fullerene bulk heterojunction solar cells. *Adv. Mater.* 2013, 25, 2434-2439.
- (2) Campbell, I. H.; Hagler, T. W.; Smith, D. L.; Ferraris, J. P., Direct measurement of conjugated polymer electronic excitation energies using metal/polymer/metal structures. *Phys. Rev. Lett.* 1996, 76, 1900-1903.
- (3) Jain, A.; Kumar, P.; Jain, S. C.; Kumar, V.; Kaur, R.; Mehra, R. M., Trap filled limit voltage (VTFL) and V2 law in space charge limited currents. *J. Appl. Phys.* 2007, 102, 094505.
- (4) Dong, Y.; Wang, Y. K.; Yuan, F.; Johnston, A.; Liu, Y.; Ma, D.; Choi, M. J.; Chen, B.; Chekini, M.; Baek, S. W.; Sagar, L. K.; Fan, J.; Hou, Y.; Wu, M.; Lee, S.; Sun, B.; Hoogland, S.; Quintero-Bermudez, R.; Ebe, H.; Todorovic, P.; Dinic, F.; Li, P.; Kung, H. T.; Saidaminov, M. I.; Kumacheva, E.; Spiecker, E.; Liao, L. S.; Voznyy, O.; Lu, Z. H.; Sargent, E. H., Bipolar-shell resurfacing for blue LEDs based on strongly confined perovskite quantum dots. *Nat. Nanotechnol.* 2020, 15, 668-674.
